# Supplementary material for: Red, green and blue emissions coexistence in white-light-emitting Ca11(SiO4)4(BO3)2:Ce3+,Eu2+,Eu3+ phosphor
Source: Royal Society of Chemistry journal article supplement (doi:10.1039/c3tc30933a), 2013-01-01
Supplement: c3tc30933a.pdf [file c3tc30933a.pdf]

## Supplementary Information

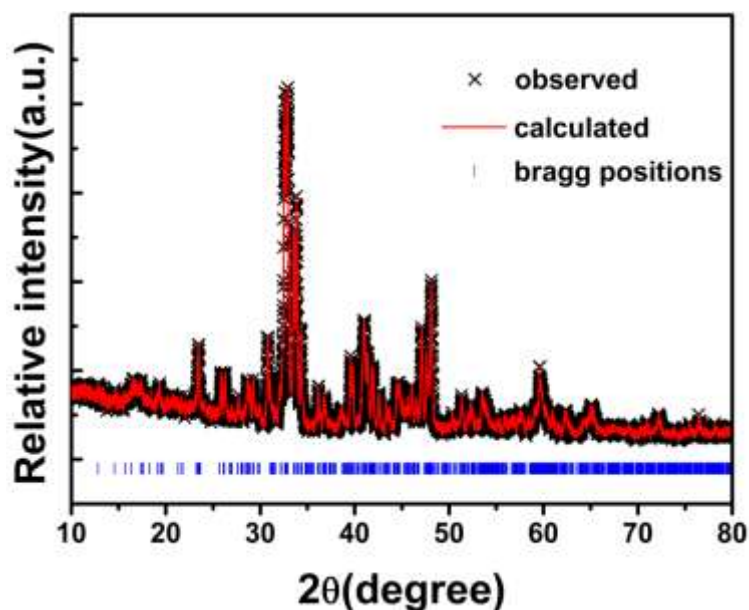

**Fig. S1** Observed (crosses) and calculated (solid line) synchrotron XRD profiles and their difference (bottom) for the Rietveld refinement of Ca<sub>11</sub>(SiO<sub>4</sub>)<sub>4</sub>(BO<sub>3</sub>)<sub>2</sub> at room temperature.

The room-temperature powder X-ray diffraction patterns for Ca<sub>11</sub>(SiO<sub>4</sub>)<sub>4</sub>(BO<sub>3</sub>)<sub>2</sub> are shown in Fig. S1. The XRD data could be indexed on the basis of known β-Ca<sub>10</sub>(SiO<sub>4</sub>)<sub>4</sub>(CO<sub>3</sub>)<sub>2</sub> crystal structure and refined by the Rietveld method ( $R_{wp} = 12.89\%$ ,  $R_p = 9.11\%$ ). The products crystallize in the orthorhombic system with space group  $P2_1/a$  (No. 14).

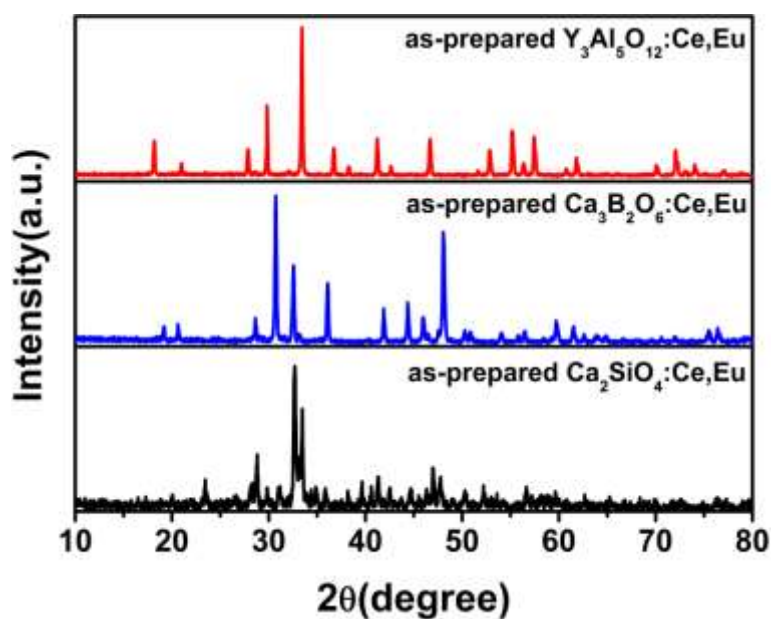

**Fig. S2** XRD patterns of as-prepared Ca<sub>2</sub>SiO<sub>4</sub>:0.02Ce,0.005Eu, Ca<sub>3</sub>B<sub>2</sub>O<sub>6</sub>:0.01Ce,0.001Eu and

YAG:0.02Ce,0.03Eu.

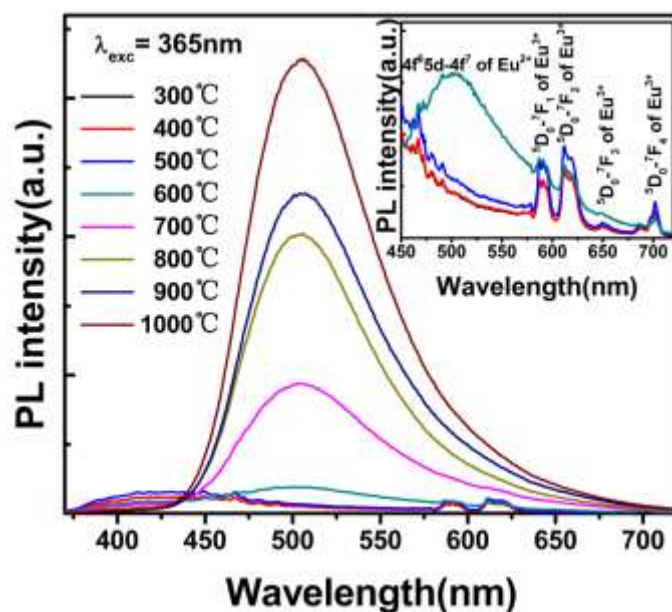

**Fig. S3** PL spectra of Al-reduced CSB:0.005Eu calcined at different temperature.

Fig. S3 shows the PL spectra of Al-reduced CSB:0.005Eu calcined at different temperature. The intense broad peaks of all samples are originated from 5d/4f transition of Eu<sup>2+</sup> ions due to the strong coupling of the 5d electron with host lattice. In the system of Al-reduced CSB:Eu<sup>2+</sup>, PL intensity increase with increasing temperature. Signals of Eu<sup>3+</sup> emission were detected in the samples prepared blow 600 °C. As shown in Fig. S3, a few sharp emission peaks are observed at 587, 613, 623, 650, 702 nm. All these are characteristic emission peaks of Eu<sup>3+</sup> ions, indicating that the reduction temperature from Eu<sup>3+</sup> ions Eu<sup>2+</sup> in CSB host may occur at about 600 °C.

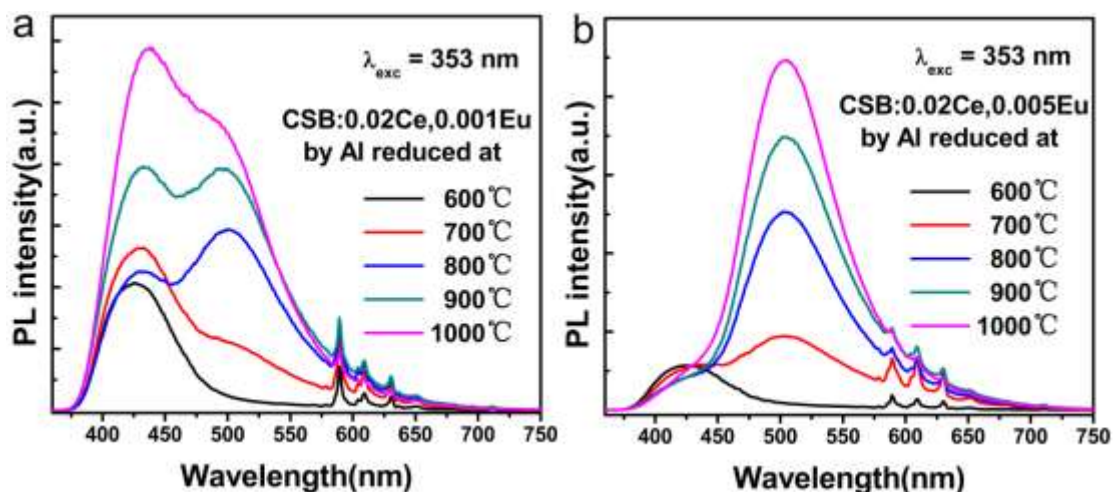

**Fig. S4** PL spectra of Al-reduced CSB:0.02Ce,0.001Eu and CSB:0.02Ce,0.005Eu calcined at different temperature.

Quantum efficiencies of selected samples were calculated according to the method described by de Mello *et al*<sup>S1</sup> and Palsson *et al*<sup>S2</sup>. Briefly, the method allows determining the sample quantum efficiency  $\Phi_f$  by measuring the ratio between the number of photons emitted ( $N_{em}$ ) and the number of those absorbed ( $N_{abs}$ ) by the sample using the relation:  $\Phi_f = N_{em}/N_{abs} = (E_c - E_a)/(L_a - L_c)$  where  $E_c$  is the integrated luminescence of the sample caused by direct excitation,  $E_a$  is the integrated luminescence from an empty integrating sphere (without the sample, only a blank),  $L_a$  is the integrated excitation profile from an empty integrating sphere, and  $L_c$  is the integrated excitation profile when the sample is directly excited by the incident beam.

**Table S1** The chromaticity coordinates of phosphors CSB:0.02Ce,0.001Eu and CSB:0.02Ce,0.001Eu at different reduction temperature.

| reduction temperature (°C) | CIE (x, y)         |                    |
|----------------------------|--------------------|--------------------|
|                            | CSB:0.02Ce,0.001Eu | CSB:0.02Ce,0.005Eu |
| 600                        | (0.195, 0.090)     | (0.208, 0.118)     |
| 700                        | (0.213, 0.193)     | (0.267, 0.348)     |
| 800                        | (0.215, 0.306)     | (0.241, 0.426)     |
| 900                        | (0.201, 0.266)     | (0.243, 0.442)     |
| 1000                       | (0.179, 0.216)     | (0.223, 0.436)     |

**References:**

- S1 J. C. De Mello, H. F. Wittmann, and R. H. Friend, *Adv. Mater.*, 1997, **9**, 230-232.
- S2 L. O. Palsson and A. P. Monkman, *Adv. Mater.*, 2002, **14**, 757-758.
